# Supplementary material for: Identification of a novel type III secretion-associated outer membrane-bound protein from Xanthomonas campestris pv. campestris
Source: PubMed Central journal article supplement (PMC5309889; doi:10.1038/srep42724), 2017-02-15
Supplement: srep42724-s1.pdf [file srep42724-s1.pdf]

## Supplementary information

Title: Identification of a novel type III secretion-associated outer membrane-bound protein from *Xanthomonas campestris* pv. *campestris*

Authors: Lei Li, Rui-Fang Li, Zhen-Hua Min, Guang-Tao Lu & Ji-Liang Tang

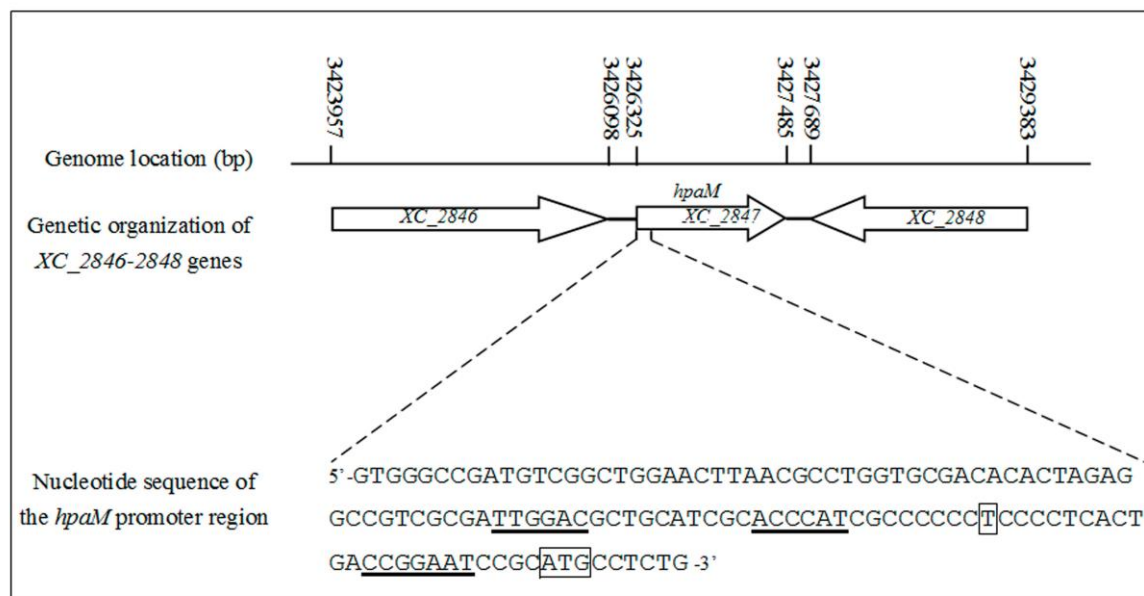

**Supplementary Figure 1.** Genetic and physical map of *hpaM* (*XC\_2847*) gene in the genome of the *Xcc* strain 8004. The positions and orientations of the genes *XC\_2846-2848* are shown: arrows indicate length, location and orientation of the genes; lines between arrows indicate intergenic sequences. The lower element shows 120 bp DNA sequence downstream of the previously annotated translational start codon (GTG) of *XC\_2847*. The transcriptional start site determined in this study and the corresponding translational start codon (ATG) are indicated by square and rectangular frame, respectively. The putative -10 and -35 sequences and the Shine-Dalgarno sequence are shown underlined.

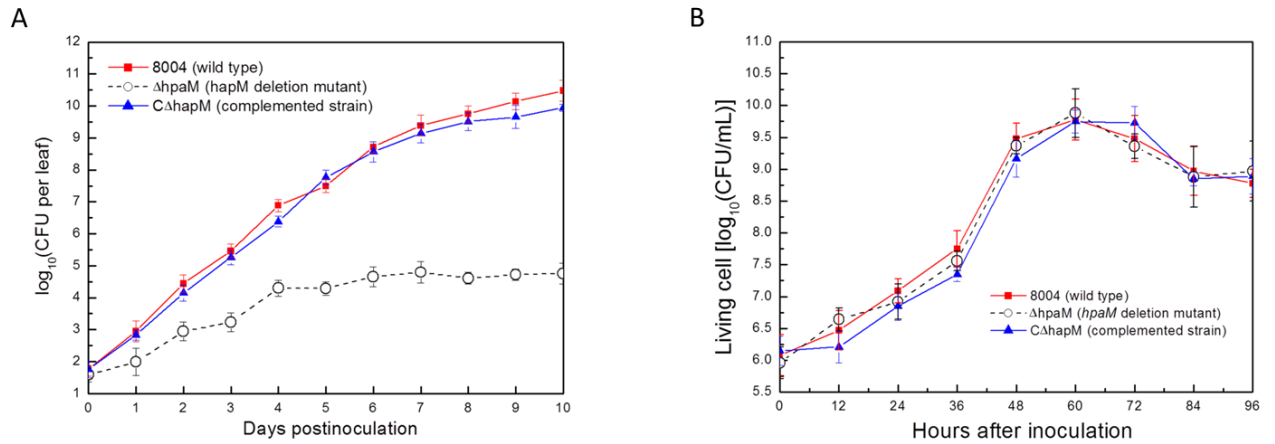

**Supplementary Figure 2.** Growth of *hpaM* mutant. A, Bacterial population of *Xcc* strains in the host plant Chinese radish leaves. Inoculated leaves for each strain were taken daily and homogenized in SPB (sodium phosphate buffer). The homogenates were diluted and plated on NYG plates. Bacterial CFUs were counted after incubation for 3 days. Data are the means and standard deviations from three replicates. B, Growth of *Xcc* strains in minimal medium MMX. Strains were inoculated into 100 ml MMX liquid medium. Samples were taken in triplicate at intervals of 12 h, diluted, and plated on NYG plates. Bacterial CFU were counted after incubation for 3 days.

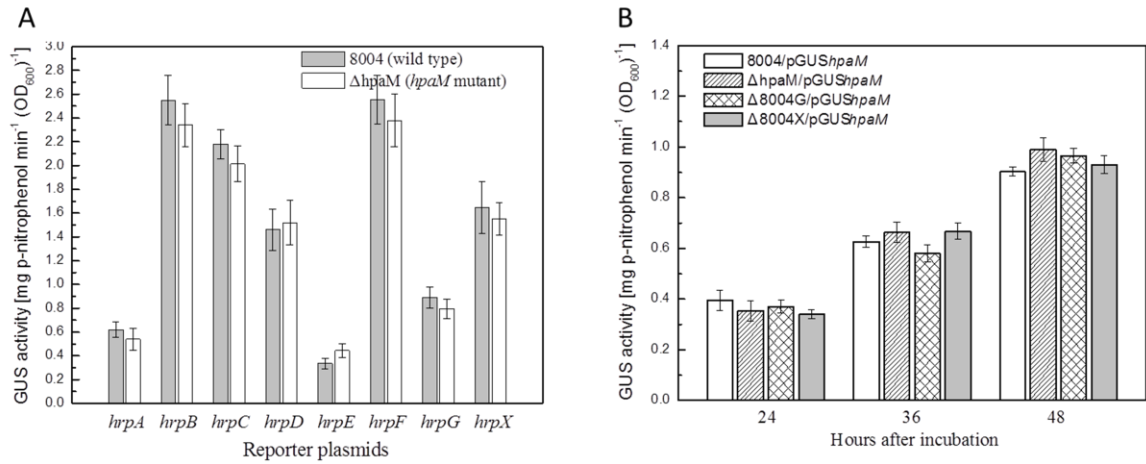

**Supplementary Figure 3.** No regulation between *hpaM* and *hrp* genes. **A**, GUS activity of *hrpG*, *hrpX* and six *hrp* operons (*hrpA-F*) promoter-*gusA* reporters in *hpaM* mutation and wild-type backgrounds. Strains were cultured in MMX medium for 48 h, and GUS activity was then determined by measurement of OD<sub>415</sub> using  $\rho$ -nitrophenyl- $\beta$ -D-glucuronide as substrate. Data are means  $\pm$  standard deviations of triplicate measurements. The experiment was repeated twice, and similar results were obtained. **B**, GUS activity of *hpaM* promoter-*gusA* reporter in *hrpG*, *hrpX* mutation and wild-type backgrounds. Strains were cultured in MMX medium for 24, 36 and 48 h, and GUS activity in the cell lysate was determined. Data are means  $\pm$  standard deviations of triplicate measurements. The experiment was repeated twice, and similar results were obtained.

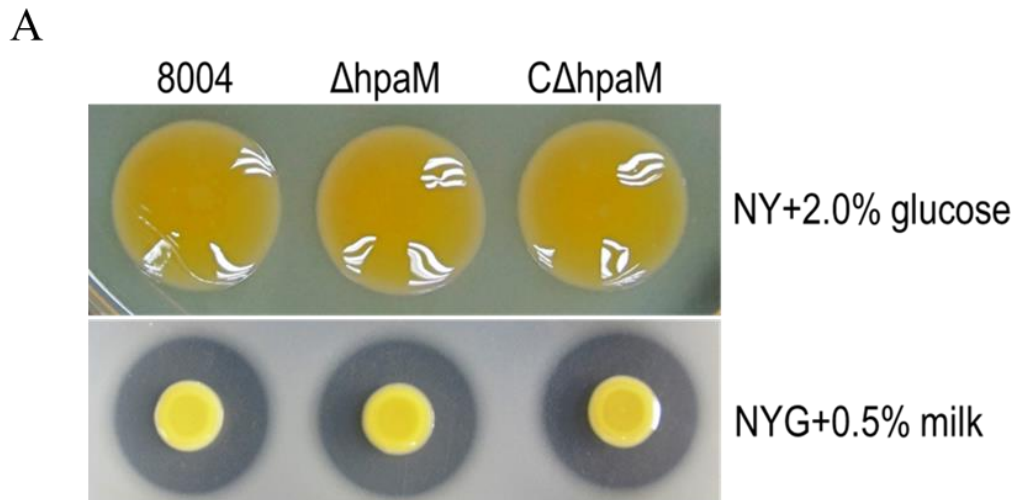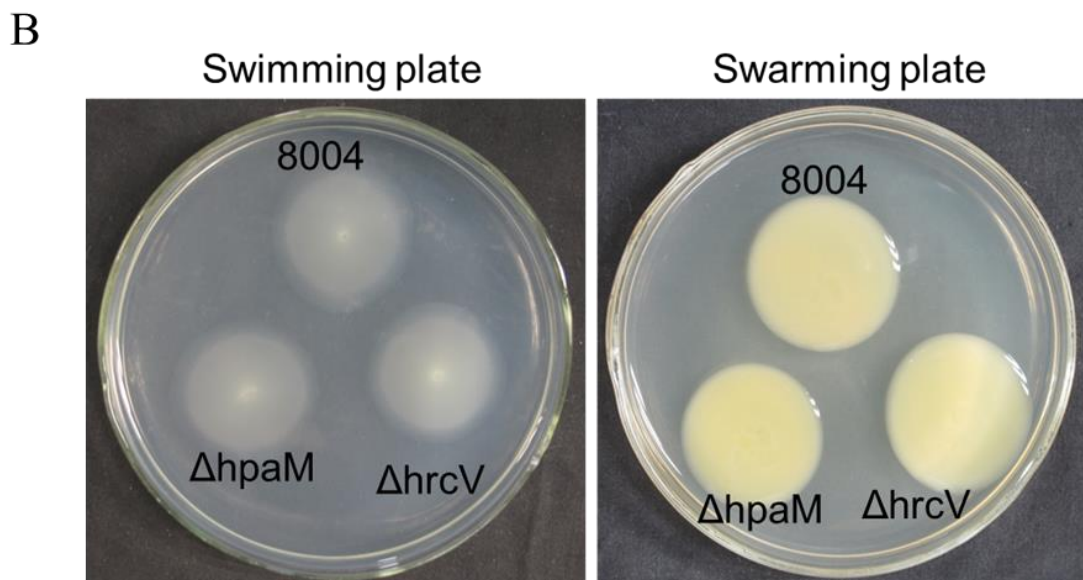

**Supplementary Figure 4.** HpaM mutation plays no impacts on the activity of extracellular proteases, EPS production and cell motility in *Xcc*. **A**, Plate assays (Tang et al. 1991) were used to test the activity of exoproteases, EPS production. An overnight culture (2  $\mu$ l, OD<sub>600</sub> = 1.0) of each *Xcc* strain was spotted onto a tested plate. For estimation of the activity of exoproteases, strains on NYG plates 0.5% (wt/vol) skim milk (Sangon, Shanghai, China) were incubated at 28 °C for 48 h. Zones of

clearance around the spot, which due to the degradation of the substrate, from each tested *Xcc* strain were similar, indicating the activity of exoproteases of *hpaM* mutant strain was similar to that of the wild type. For EPS production, bacteria on NY plates containing 2.0% (wt/vol) glucose were incubated at 28 °C for 5 days. The mutant displayed similar colonies to the wild-type strain, indicating the EPS yield of *hpaM* mutant strain was similar to that of the wild type strain. Similar results were obtained in two other independent experiments. **B**, Example photographs of *Xcc* wild type strain 8004, *hpaM* mutant strain  $\Delta hpaM$  and *hrcV* mutant strain  $\Delta hrcV$  on motility assay plates (Su et al., 2016). To detect swimming motility, an overnight culture (OD<sub>600</sub> of 1.0) of each *Xcc* strain was stabbed into 0.28% agar plates composed of 0.03% Bacto peptone and 0.03% yeast extract followed by incubation at 28 oC for 4 days. To test swarming motility, the bacterial cells were inoculated onto NY plates containing 2% glucose and 0.6% agar using a toothpick, and then incubated at 28 °C for 3 days.

## References

Su, H.Z., Wu, L., Qi, Y.H., Liu, G.F., Lu, G.T., Tang, J.L. (2016) Characterization of the GntR family regulator HpaR1 of the crucifer black rot pathogen *Xanthomonas campestris* pathovar *campestris*. *Sci Rep* **6**:19862.

Tang, J.L., Liu, Y.N., Barber, C.E., Dow, J.M., Wootton, J.C., Daniels, M.J. (1991) Genetic and molecular analysis of a cluster of *rpf* genes involved in positive regulation of synthesis of extracellular enzymes and polysaccharide in *Xanthomonas campestris* pathovar *campestris*. *Mol Gen Genet* **226**: 409–417.

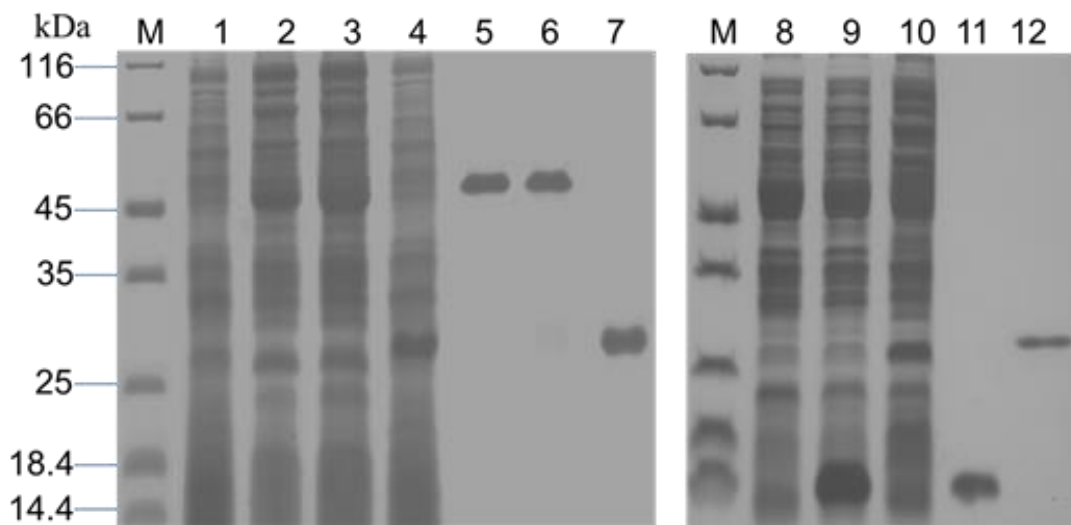

**Supplementary Figure 5.** His<sub>6</sub>-tagged fusion proteins were overexpressed and purified. Lanes: 1, crude extract BL21/pET30a; 2, crude extract BL21/pET30a-HpaM<sub>LN22</sub> induced with IPTG; 3, crude extract BL21/pET30a-HrcC<sub>34-370</sub> induced with IPTG; 4, crude extract BL21/pET30a-HrcJ<sub>22-206</sub> induced with IPTG; 5, affinity-purified His<sub>6</sub>-HpaM<sub>LN22</sub> protein; 6, affinity-purified His<sub>6</sub>-HrcC<sub>34-370</sub> protein; 7, affinity-purified His<sub>6</sub>-HrcJ<sub>22-206</sub> protein; 8, crude extract BL21/pET30a; 9, crude extract BL21/pET30a-HpaM<sub>LN180-225</sub> induced with IPTG; 10, crude extract BL21/pET30a-HpaMLN<sub>180-320</sub> induced with IPTG; 11, affinity-purified His<sub>6</sub>-HpaM<sub>LN180-225</sub>; 12, affinity-purified His<sub>6</sub>-HpaM<sub>LN180-320</sub>; M, molecular mass marker.

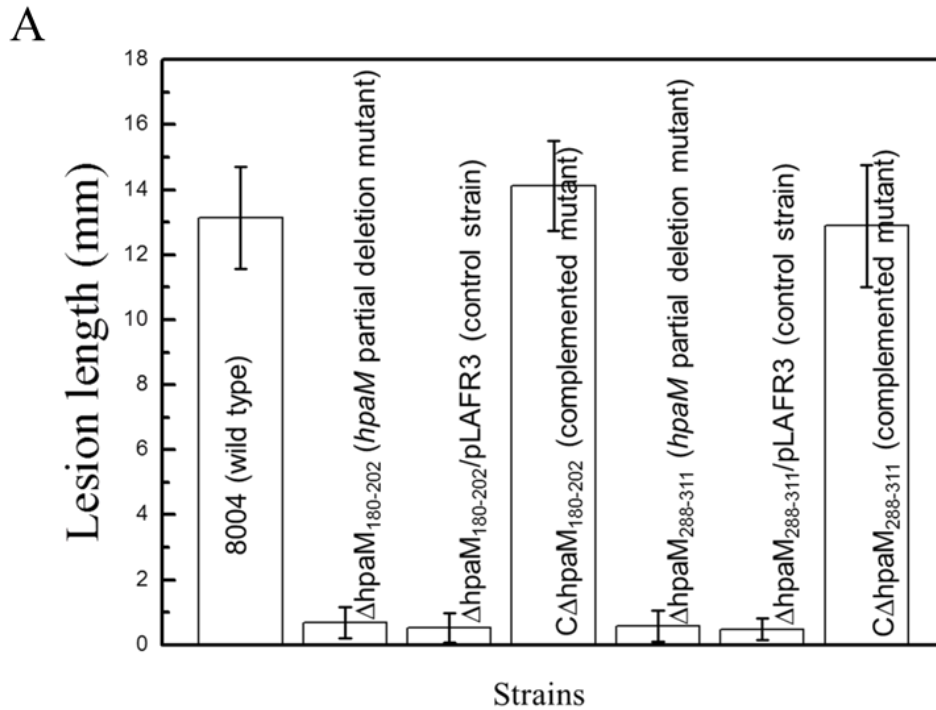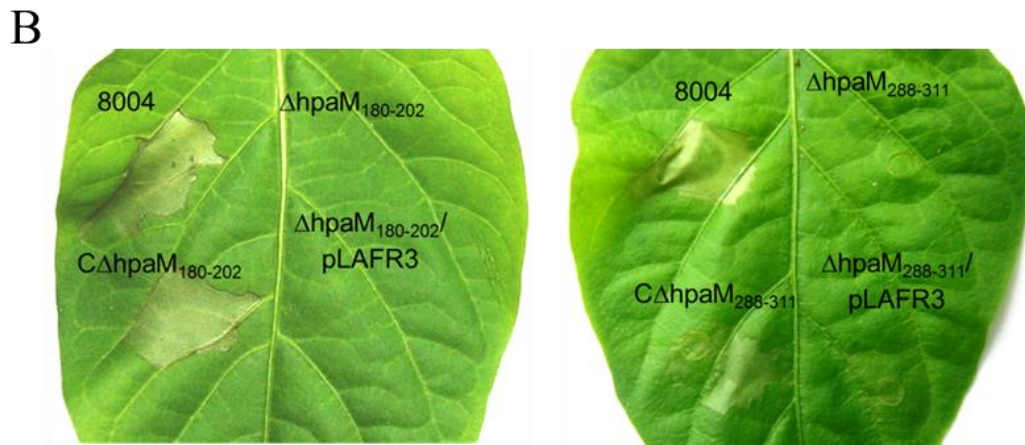

**Supplementary Figure 6.** *Xcc* mutant strain with HpaM deletion in 180<sup>th</sup>-202<sup>th</sup> aa ( $\Delta hpaM_{180-202}$ ) or 288<sup>th</sup>-311<sup>th</sup> aa ( $\Delta hpaM_{288-311}$ ) lose virulence in host plant and the ability of HR induction in non-host plant. **A**, Mean lesion lengths caused by different strains in the host plant Chinese radish (*Raphanus sativus*). *Xcc* wild-type strain 8004 and its derivatives from overnight culture were washed and resuspended in SPB to an OD<sub>600</sub> of 0.1. Leaves were cut with scissors dipped in the bacterial suspensions. The lesion lengths were measured at 10 days post-inoculation. Values given are the means and standard deviations from 15 measurements in one experiment. The experiment

was repeated three times with similar results. **B**, HR symptoms induced by *Xcc* strains in pepper leaves (*Capsicum annuum* cv. ECW-10R). Bacterial cells from overnight culture were washed with 10 mM SPB and resuspended in the same buffer to an OD<sub>600</sub> of 0.1). Approximately 5 µl bacterial resuspension was infiltrated into the leaf mesophyll tissue with a blunt-end plastic syringe. Pictures of the inoculated pepper leaves were taken at 24 h after infiltration. The mutants  $\Delta$ hpaM<sub>180-202</sub> and  $\Delta$ hpaM<sub>288-311</sub> could not induce HR symptoms in pepper leaves. Three replications were done in each experiment, and each experiment was repeated three times. The results presented are from a representative experiment, and similar results were obtained in all other independent experiments.



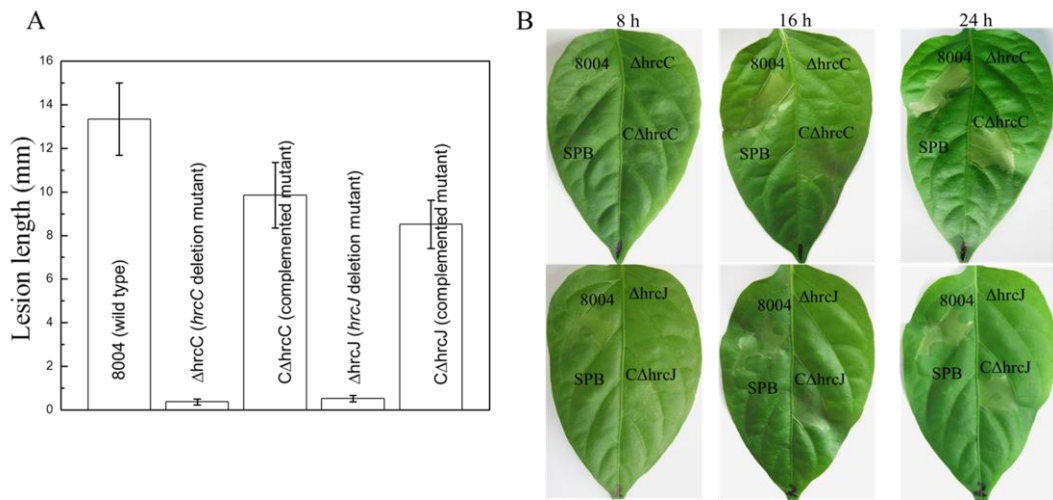

**Supplementary Figure 7.** HrcC and HrcJ are essential for pathogenicity of *Xcc*. **A**, the lesion length caused by *Xcc* wild-type strain 8004, *hrcC* deletion mutant  $\Delta hrcC$  and its complemented strain C $\Delta hrcC$ , *hrcJ* deletion mutant  $\Delta hrcJ$  and its complemented strain C $\Delta hrcJ$ . *Xcc* strains were inoculated into its host plant Chinese radish (*Raphanus sativus*) leaves and lesion lengths were scored 10 days postinoculation. Values represent means and standard deviation from twenty inoculated leaves in one experiment. The experiment was repeated three times with similar results. **B**, HR symptoms induced in pepper (*Capsicum annuum* cv. ECW-10R) leaves by *Xcc* strains. Bacterial cells from overnight culture were washed, resuspended in SPB (sodium phosphate buffer) to a concentration of  $OD_{600} = 0.1$  and infiltrated into the leaf mesophyll tissue. Pictures of the inoculated pepper leaves were taken at 8, 16 and 24 h after infiltration. Three replications were done in each experiment, and the experiment was repeated three times. The results presented are from a representative experiment, and similar results were obtained in all other independent experiments.

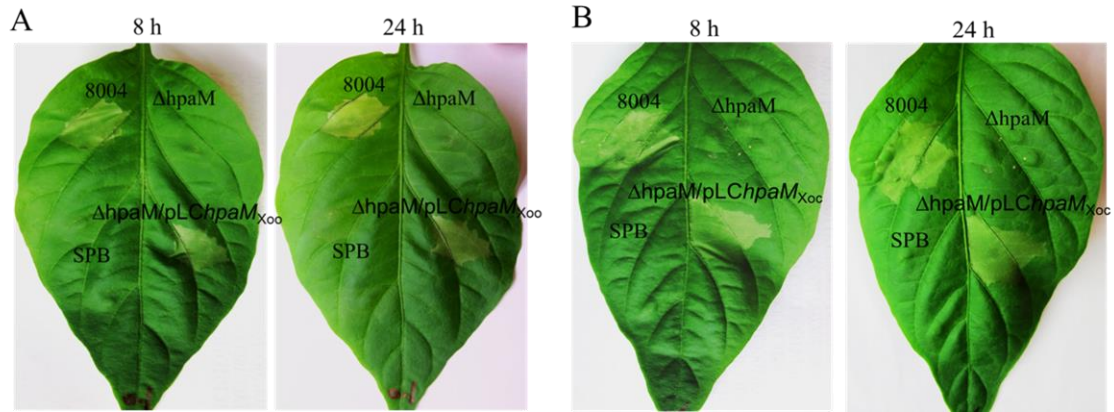

**Supplementary Figure 8.** Restoration of HR induction of *hpaM* mutant by *hpaM* homologues from *Xoo* (A) and *Xoc* (B). *Xcc* strains were cultured in NYG medium and resuspended in SPB to an  $OD_{600}=0.1$  ( $1 \times 10^8$  CFU ml<sup>-1</sup>). Approximately 5  $\mu$ l bacterial resuspension was infiltrated into the leaf mesophyll of pepper plant. The leaves were photographed at 8 and 24 h after infiltration. Three replications were done in each experiment, and the experiment was repeated three times. The results presented are from a representative experiment, and similar results were obtained in all other independent experiments. 8004, *Xcc* wild type strain;  $\Delta hpaM$ , *Xcc hpaM* deletion mutant;  $\Delta hpaM/pLChpaM_{Xoo}$ ,  $\Delta hpaM$  harboring the recombinant plasmid that contains the *hpaM* homologue from *Xoo*;  $\Delta hpaM/pLChpaM_{Xoc}$ ,  $\Delta hpaM$  harboring the recombinant plasmid that contains the *hpaM* homologue from *Xoc*.

**Table S1.** Strains and plasmids used in this study

| Strains or plasmids                                           | Relevant characteristics                                                                                                                                                                  | Reference or source                 |
|---------------------------------------------------------------|-------------------------------------------------------------------------------------------------------------------------------------------------------------------------------------------|-------------------------------------|
| <i>E. coli</i> strains                                        |                                                                                                                                                                                           |                                     |
| JM109                                                         | <i>RecA1, endA1, gyrA96, thi, supE44, relA1</i><br>$\Delta$ ( <i>lac-proAB</i> )/F' [ <i>traD36, lacI<sup>q</sup>, lacZ</i> $\Delta$ M15]                                                 | Yanisch-Perron <i>et al.</i> , 1985 |
| DH5 $\alpha$                                                  | $\Phi$ 80 $\Delta$ <i>lacZ</i> M15 <i>recA1 endA1 deoR</i>                                                                                                                                | Gibco BRL, Life Technologies        |
| BL21(DE3)                                                     | F <sup>-</sup> <i>ompT gal dcm lon hsdS<sub>B</sub> (r<sub>B</sub> m<sub>B</sub>)</i> $\lambda$ (DE3)                                                                                     | Novagen, Germany                    |
| XL1-Blue MRF'                                                 | Reporter strain, $\Delta$ ( <i>mcrA</i> )I83<br>$\Delta$ ( <i>mcrCB-hsdSMR-mrr</i> )I73 <i>endA1 hisB supE44 thi-1 recA1 gyrA96relA1 lac</i> [F' <i>lacIq HIS3 aadA Kan<sup>r</sup></i> ] | Stratagene                          |
| <i>Xanthomonas oryzae</i> pv. <i>oryzae</i> strains           |                                                                                                                                                                                           |                                     |
| PXO99 <sup>A</sup>                                            | Wild-type strain, Philippine race 6, Azacytidine resistant clone of PXO99, Rif <sup>r</sup>                                                                                               | Hopkins <i>et al.</i> , 1992        |
| $\Delta$ hpaM <sub>Xoo</sub>                                  | <i>hpaM<sub>Xoo</sub></i> gene ( <i>PXO_01147</i> ) deletion mutant derived from PXO99 <sup>A</sup> , Rif <sup>r</sup>                                                                    | This work                           |
| C $\Delta$ hpaM <sub>Xoo</sub>                                | $\Delta$ hpaM <sub>Xoo</sub> harboring pLChpaM <sub>Xoo</sub> , Rif <sup>r</sup> Tet <sup>r</sup>                                                                                         | This work                           |
| $\Delta$ hrcC <sub>Xoo</sub>                                  | <i>hrcC</i> gene deletion mutant derived from PXO99 <sup>A</sup> , Rif <sup>r</sup>                                                                                                       | Author's lab collection             |
| $\Delta$ hpaM <sub>Xoo</sub> /pR <i>hpaM<sub>Xoo</sub></i> H6 | $\Delta$ hpaM <sub>Xoo</sub> harboring recombinant plasmid pR <i>hpaM<sub>Xoo</sub></i> H6, Rif <sup>r</sup> Tet <sup>r</sup>                                                             | This work                           |
| PXO99 <sup>A</sup> /pGUS <i>avrAC</i>                         | Wild-type strain PXO99 <sup>A</sup> harboring recombinant plasmid pGUS <i>avrAC</i> , Rif <sup>r</sup> Tet <sup>r</sup>                                                                   | This work                           |
| $\Delta$ hpaM <sub>Xoo</sub> /pGUS <i>avrAC</i>               | $\Delta$ hpaM <sub>Xoo</sub> harboring recombinant plasmid pGUS <i>avrAC</i> , Rif <sup>r</sup> Tet <sup>r</sup>                                                                          | This work                           |
| $\Delta$ hrcC <sub>Xoo</sub> /pGUS <i>avrAC</i>               | $\Delta$ hrcC <sub>Xoo</sub> harboring recombinant plasmid pGUS <i>avrAC</i> , Rif <sup>r</sup> Tet <sup>r</sup>                                                                          | This work                           |
| <i>Xanthomonas oryzae</i> pv. <i>oryzicola</i> strains        |                                                                                                                                                                                           |                                     |
| GX01                                                          | Wild-type strain, isolated from Guangxi, China, Rif <sup>r</sup>                                                                                                                          | Author's lab collection             |
| $\Delta$ hpaM <sub>Xoc</sub>                                  | <i>hpaM<sub>Xoc</sub></i> gene deletion mutant derived from GX01, Rif <sup>r</sup>                                                                                                        | This study                          |
| C $\Delta$ hpaM <sub>Xoc</sub>                                | $\Delta$ hpaM <sub>Xoc</sub> harboring the plasmid pLChpaM <sub>Xoc</sub> , Rif <sup>r</sup> Tet <sup>r</sup>                                                                             | This study                          |
| $\Delta$ hrcC <sub>Xoc</sub>                                  | <i>hrcC</i> gene deletion mutant derived from GX01, Rif <sup>r</sup>                                                                                                                      | Author's lab collection             |
| $\Delta$ hpaM <sub>Xoc</sub> /pR <i>hpaM<sub>Xoc</sub></i> H6 | $\Delta$ hpaM <sub>Xoc</sub> harboring the recombinant plasmid pR <i>hpaM<sub>Xoc</sub></i> H6, Rif <sup>r</sup> Tet <sup>r</sup>                                                         | This work                           |
| GX01/pGUS <i>avrAC</i>                                        | GX01 harboring the recombinant plasmid                                                                                                                                                    | This work                           |

|                                                             |                                                                                                                     |                              |
|-------------------------------------------------------------|---------------------------------------------------------------------------------------------------------------------|------------------------------|
|                                                             | pGUS <i>savrAC</i> , Rif <sup>r</sup> Tet <sup>r</sup>                                                              |                              |
| ΔhpaM <sub>Xoc</sub> /pGUS <i>savrAC</i>                    | ΔhpaM <sub>Xoc</sub> harboring the recombinant plasmid pGUS <i>savrAC</i> , Rif <sup>r</sup> Tet <sup>r</sup>       | This work                    |
| ΔhrcC <sub>Xoc</sub> /pGUS <i>savrAC</i>                    | ΔhrcC <sub>Xoc</sub> harboring the recombinant plasmid pGUS <i>savrAC</i> , Rif <sup>r</sup> Tet <sup>r</sup>       | This work                    |
| <i>Xanthomonas campestris</i> pv. <i>campestris</i> strains |                                                                                                                     |                              |
| 8004                                                        | Wild-type strain, Rif <sup>r</sup>                                                                                  | Daniels <i>et al.</i> , 1984 |
| 083E12                                                      | As 8004, but XC_2847::Tn5 <i>gusA5</i> , virulence-deficient mutant, Rif <sup>r</sup> Kan <sup>r</sup>              | Author's lab collection      |
| ΔhpaM                                                       | As 8004, but <i>hpaM</i> gene (XC_2847) deleted, non-polar effect. Rif <sup>r</sup>                                 | This work                    |
| CΔhpaM                                                      | ΔhpaM harboring the recombinant plasmid pL <i>ChpaM</i> , Rif <sup>r</sup> Tet <sup>r</sup>                         | This work                    |
| ΔhpaM/pL <i>ChpaM</i> <sub>Xoo</sub>                        | ΔhpaM harboring the recombinant plasmid pL <i>ChpaM</i> <sub>Xoo</sub> , Rif <sup>r</sup> Tet <sup>r</sup>          | This work                    |
| ΔhpaM/pL <i>ChpaM</i> <sub>Xoc</sub>                        | ΔhpaM harboring the recombinant plasmid pL <i>ChpaM</i> <sub>Xoc</sub> , Rif <sup>r</sup> Tet <sup>r</sup>          | This work                    |
| ΔhpaM <sub>180-202</sub>                                    | As 8004, but HpaM is deleted in 180 <sup>th</sup> -202 <sup>th</sup> aa, non-polar effect. Rif <sup>r</sup>         | This work                    |
| CΔhpaM <sub>180-202</sub>                                   | ΔhpaM <sub>180-202</sub> harboring the recombinant plasmid pL <i>ChpaM</i> , Rif <sup>r</sup> Tet <sup>r</sup>      | This work                    |
| ΔhpaM <sub>288-311</sub>                                    | As 8004, but HpaM is deleted in 288 <sup>th</sup> -311 <sup>th</sup> aa, non-polar effect. Rif <sup>r</sup>         | This work                    |
| CΔhpaM <sub>288-311</sub>                                   | ΔhpaM <sub>288-311</sub> harboring the recombinant plasmid pL <i>ChpaM</i> , Rif <sup>r</sup> Tet <sup>r</sup>      | This work                    |
| ΔhpaM/pGUS <i>hpaM</i>                                      | ΔhpaM harboring the recombinant plasmid pGUS <i>hpaM</i> , Rif <sup>r</sup> Tet <sup>r</sup>                        | This work                    |
| ΔavrBs1 <sub>Xcc</sub>                                      | As 8004, but the avirulence gene <i>avrBs1</i> <sub>Xcc</sub> (XC_2081) deleted, non-polar effect. Rif <sup>r</sup> | Xu <i>et al.</i> , 2008      |
| ΔhpaM/pR <i>hpaMH6</i>                                      | ΔhpaM harboring the recombinant plasmid pR <i>hpaMH6</i> , Rif <sup>r</sup> Tet <sup>r</sup>                        | This work                    |
| 8004/pGUS <i>savrAC</i>                                     | 8004 harboring the reporter plasmid pGUS <i>savrAC</i> , Rif <sup>r</sup> Tet <sup>r</sup>                          | This work                    |
| 8004/pGUS <i>xopN</i>                                       | 8004 harboring the reporter plasmid pGUS <i>xopN</i> , Rif <sup>r</sup> Tet <sup>r</sup>                            | This work                    |
| 8004/pL6 <i>gus</i>                                         | 8004 harboring the recombinant plasmid pL6 <i>gus</i> , Rif <sup>r</sup> Tet <sup>r</sup>                           | This work                    |
| 8004/pL <i>avrAC</i> <sub>102</sub> ::CyaA                  | 8004 harboring the reporter plasmid pL <i>avrAC</i> <sub>102</sub> ::CyaA, Rif <sup>r</sup> Tet <sup>r</sup>        | This work                    |
| ΔhpaM/pGUS <i>savrAC</i>                                    | ΔhpaM harboring the reporter plasmid pGUS <i>savrAC</i> , Rif <sup>r</sup> Tet <sup>r</sup>                         | This work                    |

|                                       |                                                                                                         |                         |
|---------------------------------------|---------------------------------------------------------------------------------------------------------|-------------------------|
| $\Delta$ hpaM/pGUS $xopN$             | $\Delta$ hpaM harboring the reporter plasmid pGUS $xopN$ , Rif <sup>r</sup> Tet <sup>r</sup>            | This work               |
| $\Delta$ hpaM/pLavrAC $_{102}::$ CyaA | $\Delta$ hpaM harboring the reporter plasmid pLavrAC $_{102}::$ CyaA, Rif <sup>r</sup> Tet <sup>r</sup> | This work               |
| $\Delta$ 8004G                        | As 8004, but <i>hrpG</i> deleted, Rif <sup>r</sup> Kan <sup>r</sup>                                     | Author's lab collection |
| $\Delta$ 8004X                        | As 8004, but <i>hrpX</i> deleted, Rif <sup>r</sup> Kan <sup>r</sup>                                     | Author's lab collection |
| $\Delta$ hrcV                         | As 8004, but <i>hrcV</i> deleted, Rif <sup>r</sup>                                                      | Author's lab collection |
| $\Delta$ hrcV/pGUS $savrAC$           | $\Delta$ hrcV harboring the reporter plasmid pGUS $savrAC$ , Rif <sup>r</sup> Tet <sup>r</sup>          | This work               |
| $\Delta$ hrcV/pGUS $xopN$             | $\Delta$ hrcV harboring the reporter plasmid pGUS $xopN$ , Rif <sup>r</sup> Tet <sup>r</sup>            | This work               |
| $\Delta$ hrcV/pLavrAC $_{102}::$ CyaA | $\Delta$ hrcV harboring the reporter plasmid pLavrAC $_{102}::$ CyaA, Rif <sup>r</sup> Tet <sup>r</sup> | This work               |
| $\Delta$ hrcC                         | As 8004, but <i>hrcC</i> deleted, Rif <sup>r</sup>                                                      | Author's lab collection |
| $\Delta$ hrcC/pR $hrcCH6$             | $\Delta$ hrcC harboring the recombinant plasmid pR $hrcCH6$ , Rif <sup>r</sup> Tet <sup>r</sup>         | This work               |
| $\Delta$ hrcJ                         | As 8004, but <i>hrcJ</i> deleted, Rif <sup>r</sup>                                                      | Author's lab collection |
| $\Delta$ hrcJ/pR $hrcJH6$             | $\Delta$ hrcJ harboring the recombinant plasmid pR $hrcJH6$ , Rif <sup>r</sup> Tet <sup>r</sup>         | This work               |
| $\Delta$ hpaR1/pR $hpaRIH6$           | $\Delta$ hpaR1 harboring the recombinant plasmid pR $hpaRIH6$ , Rif <sup>r</sup> Tet <sup>r</sup>       | Author's lab collection |
| $\Delta$ hpaS/pR $hpaSH6$             | $\Delta$ hpaS harboring the recombinant plasmid pR $hpaSH6$ , Rif <sup>r</sup> Tet <sup>r</sup>         | Author's lab collection |
| $\Delta$ hpaM-hrcC                    | As 8004, but both <i>hpaM</i> and <i>hrcC</i> deleted, Rif <sup>r</sup>                                 | This work               |
| $\Delta$ hpaM-hrcC/pR $hpaMH6$        | $\Delta$ hpaM-HrcC harboring the recombinant plasmid pR $hpaMH6$ , Rif <sup>r</sup> Tet <sup>r</sup>    | This work               |
| $\Delta$ avrAC                        | As 8004, but <i>avrAC</i> gene ( <i>XC_1553</i> ) deleted, Rif <sup>r</sup>                             | This work               |
| $\Delta$ avrAC-hpaM                   | As 8004, but both <i>avrAC</i> and <i>hpaM</i> deleted, Rif <sup>r</sup>                                | This work               |
| $\Delta$ avrAC-hrcV                   | As 8004, but both <i>avrAC</i> and <i>hrcV</i> deleted, Rif <sup>r</sup>                                | This work               |
| $\Delta$ avrAC/pR $avrACH6$           | $\Delta$ avrAC harboring the recombinant plasmid pR $avrACH6$ , Rif <sup>r</sup> Tet <sup>r</sup>       | This work               |
| $\Delta$ avrAC-hpaM/pR $avrACH6$      | $\Delta$ avrAC-hpaM harboring the recombinant plasmid pR $avrACH6$ , Rif <sup>r</sup> Tet <sup>r</sup>  | This work               |
| $\Delta$ avrAC-hrcV/pR $avrACH6$      | $\Delta$ avrAC-hrcV harboring the recombinant                                                           | This work               |

|                                 |                                                                                                                        |           |
|---------------------------------|------------------------------------------------------------------------------------------------------------------------|-----------|
|                                 | plasmid p <i>RavrACH6</i> , Rif <sup>r</sup> Tet <sup>r</sup>                                                          |           |
| 8004/pGUS <i>hpaM</i>           | 8004 harbouring the recombinant plasmid pGUS <i>hpaM</i> , Rif <sup>r</sup> Tet <sup>r</sup>                           | This work |
| 8004/pGUS <i>hrpA</i>           | 8004 harbouring the recombinant plasmid pGUS <i>hrpA</i> , Rif <sup>r</sup> Tet <sup>r</sup>                           | This work |
| 8004/pGUS <i>hrpB</i>           | 8004 harbouring the recombinant plasmid pGUS <i>hrpB</i> , Rif <sup>r</sup> Tet <sup>r</sup>                           | This work |
| 8004/pGUS <i>hrpC</i>           | 8004 harbouring the recombinant plasmid pGUS <i>hrpC</i> , Rif <sup>r</sup> Tet <sup>r</sup>                           | This work |
| 8004/pGUS <i>hrpD</i>           | 8004 harbouring the recombinant plasmid pGUS <i>hrpD</i> , Rif <sup>r</sup> Tet <sup>r</sup>                           | This work |
| 8004/pGUS <i>hrpE</i>           | 8004 harbouring the recombinant plasmid pGUS <i>hrpE</i> , Rif <sup>r</sup> Tet <sup>r</sup>                           | This work |
| 8004/pGUS <i>hrpF</i>           | 8004 harbouring the recombinant plasmid pGUS <i>hrpF</i> , Rif <sup>r</sup> Tet <sup>r</sup>                           | This work |
| 8004/pGUS <i>hrpG</i>           | 8004 harbouring the recombinant plasmid pGUS <i>hrpG</i> , Rif <sup>r</sup> Tet <sup>r</sup>                           | This work |
| 8004/pGUS <i>hrpX</i>           | 8004 harbouring the recombinant plasmid pGUS <i>hrpX</i> , Rif <sup>r</sup> Tet <sup>r</sup>                           | This work |
| Δ8004G/pGUS <i>hpaM</i>         | Δ8004G harbouring the recombinant plasmid pGUS <i>hpaM</i> , Rif <sup>r</sup> Kan <sup>r</sup> Tet <sup>r</sup>        | This work |
| Δ8004X/pGUS <i>hpaM</i>         | Δ8004X harbouring the recombinant plasmid pGUS <i>hpaM</i> , Rif <sup>r</sup> Kan <sup>r</sup> Tet <sup>r</sup>        | This work |
| 8004 /pLAFR3                    | 8004 harbouring the plasmid pLAFR3, Rif <sup>r</sup> Tet <sup>r</sup>                                                  | This work |
| Δ <i>hpaM</i> /pGUS <i>hpaM</i> | Δ <i>hpaM</i> harbouring the recombinant plasmid pGUS <i>hpaM</i> , Rif <sup>r</sup> Tet <sup>r</sup>                  | This work |
| Δ <i>hpaM</i> /pGUS <i>hrpA</i> | Δ <i>hpaM</i> harbouring the recombinant plasmid pGUS <i>hrpA</i> , Rif <sup>r</sup> Tet <sup>r</sup>                  | This work |
| Δ <i>hpaM</i> /pGUS <i>hrpB</i> | Δ <i>hpaM</i> harbouring the recombinant plasmid pGUS <i>hrpB</i> , Rif <sup>r</sup> Tet <sup>r</sup>                  | This work |
| Δ <i>hpaM</i> /pGUS <i>hrpC</i> | Δ <i>hpaM</i> harbouring the recombinant plasmid pGUS <i>hrpC</i> , Rif <sup>r</sup> Tet <sup>r</sup>                  | This work |
| Δ <i>hpaM</i> /pGUS <i>hrpD</i> | Δ <i>hpaM</i> harbouring the recombinant plasmid pGUS <i>hrpD</i> , Rif <sup>r</sup> Tet <sup>r</sup>                  | This work |
| Δ <i>hpaM</i> /pGUS <i>hrpE</i> | Δ <i>hpaM</i> harbouring the recombinant plasmid pGUS <i>hrpE</i> , Rif <sup>r</sup> Kan <sup>r</sup> Tet <sup>r</sup> | This work |
| Δ <i>hpaM</i> /pGUS <i>hrpF</i> | Δ <i>hpaM</i> harbouring the recombinant plasmid pGUS <i>hrpF</i> , Rif <sup>r</sup> Tet <sup>r</sup>                  | This work |
| Δ <i>hpaM</i> /pGUS <i>hrpG</i> | Δ <i>hpaM</i> harbouring the recombinant plasmid pGUS <i>hrpG</i> , Rif <sup>r</sup> Tet <sup>r</sup>                  | This work |
| Δ <i>hpaM</i> /pGUS <i>hrpX</i> | Δ <i>hpaM</i> harbouring the recombinant plasmid pGUS <i>hrpX</i> , Rif <sup>r</sup> Tet <sup>r</sup>                  | This work |

|                                   |                                                                                                                                                                              |                                    |
|-----------------------------------|------------------------------------------------------------------------------------------------------------------------------------------------------------------------------|------------------------------------|
| ΔhpaM/pLAFR3                      | ΔhpaM harbouring the plasmid pLAFR3, Rif <sup>r</sup><br>Tet <sup>r</sup>                                                                                                    | This work                          |
| Plasmids                          |                                                                                                                                                                              |                                    |
| pLAFR3                            | Broad host range cloning vector, Tet <sup>r</sup>                                                                                                                            | Staskawicz <i>et al.</i> ,<br>1987 |
| pLAFR6                            | A promoterless derivative of pLAFR3, Tet <sup>r</sup>                                                                                                                        | Huynh <i>et al.</i> , 1989         |
| pRK2073                           | Helper plasmid, Tra <sup>+</sup> , Mob <sup>+</sup> , ColE1, Spc <sup>r</sup> .                                                                                              | Leong <i>et al.</i> , 1982         |
| pK18 <i>mobsacB</i>               | pUC18 derivative, <i>lacZα</i> , <i>sacB</i> , Kan <sup>r</sup> , <i>mob</i><br>site. Allelic exchange vector (Suicidal vector<br>carrying <i>sacB</i> gene for mutagenesis) | Schäfer <i>et al.</i> ,<br>1994    |
| pET-30a                           | Expression vector, allow the production of<br>fusion proteins containing amino terminal<br>6×His-tagged sequences. Kan <sup>r</sup>                                          | Novagen                            |
| pET-30a-HpaM <sub>LN22</sub>      | pET-30a containing a 981-bp fragment of<br>truncated <i>hpaM</i> gene encoding the 23 <sup>th</sup> –349 <sup>th</sup><br>amino acids.                                       | This work                          |
| pET-30a-HpaM <sub>LN180-225</sub> | pET-30a containing a 138-bp fragment of<br>truncated <i>hpaM</i> gene encoding the<br>180 <sup>th</sup> –225 <sup>th</sup> amino acids.                                      | This work                          |
| pET-30a-HpaM <sub>LN180-320</sub> | pET-30a containing a 423-bp fragment of<br>truncated <i>hpaM</i> gene encoding the<br>180 <sup>th</sup> –320 <sup>th</sup> amino acids.                                      | This work                          |
| pET-30a-HrpC <sub>34-370</sub>    | pET-30a containing a 1011-bp fragment of<br>partial <i>hrcC</i> gene sequence encoding the<br>34 <sup>th</sup> –370 <sup>th</sup> amino acids.                               | This work                          |
| pET-30a-HrcJ <sub>22-206</sub>    | pET-30a containing a 555-bp fragment of<br>partial <i>hrcJ</i> gene sequence encoding the 22 <sup>th</sup><br>–206 <sup>th</sup> amino acids.                                | This work                          |
| pLChpaM                           | 1432-bp DNA fragment containing the full<br><i>hpaM</i> gene ( <i>XC_2847</i> ) of <i>Xcc</i> strain cloned<br>into the plasmid pLAFR6. Tet <sup>r</sup>                     | This work                          |
| pLChpaM <sub>Xoo</sub>            | 1053-bp DNA fragment of the <i>hpaM<sub>Xoo</sub></i> gene<br>ORF ( <i>PXO_01147</i> ) of <i>Xoo</i> strain cloned into<br>the plasmid pLAFR3. Tet <sup>r</sup>              | This work                          |
| pLChpaM <sub>Xoc</sub>            | 1053-bp DNA fragment of the <i>hpaM<sub>Xoc</sub></i> gene<br>ORF ( <i>XOC3053</i> ) of <i>Xoc</i> strain cloned into the<br>plasmid pLAFR3. Tet <sup>r</sup>                | This work                          |
| pBT                               | Two-hybrid system bait plasmid containing<br>the <i>cat</i> gene, p15A origin of replication and λ<br>cI ORF                                                                 | Stratagene                         |
| pBhpaM <sub>LN22</sub>            | pBT derivative carrying the 981-bp of <i>hpaM</i><br>gene lacking the nt 1 to 66, Cat <sup>r</sup>                                                                           | This work                          |

|                          |                                                                                                                                                                |                         |
|--------------------------|----------------------------------------------------------------------------------------------------------------------------------------------------------------|-------------------------|
| pBhrcC <sub>34-370</sub> | pBT derivative carrying a 1011-bp fragment of partial <i>hrcC</i> gene sequence encoding the 34 <sup>th</sup> –370 <sup>th</sup> amino acids, Cat <sup>r</sup> | This work               |
| pBThpaS <sub>LN54</sub>  | pBT derivative carrying <i>hpaS</i> gene                                                                                                                       | Li <i>et al.</i> , 2014 |
| pTRG                     | Two-hybrid system target plasmid containing the <i>tet</i> gene, ColE1 origin of replication, and RNA polymerase $\alpha$ subunit ORF                          | Stratagene              |
| pThrcC <sub>LN33</sub>   | pTRG derivative carrying the 1716-bp of truncated <i>hrcC</i> gene lacking the nt 1 to 99, Tet <sup>r</sup>                                                    | This work               |
| pThrcC <sub>34-370</sub> | pTRG derivative carrying 1011-bp fragment of partial <i>hrcC</i> gene sequence encoding the 34 <sup>th</sup> –370 <sup>th</sup> amino acids, Tet <sup>r</sup>  | This work               |
| pThrcJ <sub>LN21</sub>   | pTRG derivative carrying 699-bp of truncated <i>hrcJ</i> gene lacking the nt 1 to 63, Tet <sup>r</sup>                                                         | This work               |
| pThrcJ <sub>22-206</sub> | pTRG derivative carrying 555-bp truncated <i>hrcJ</i> gene sequence encoding the 22 <sup>th</sup> –206 <sup>th</sup> amino acids, Tet <sup>r</sup>             | This work               |
| pTRGhrpG                 | pTRG derivative carrying the full length of the coding region of <i>hrpG</i> gene (789-bp), Tet <sup>r</sup>                                                   | Li <i>et al.</i> , 2014 |
| pTRGhpaS <sub>LN54</sub> | pTRG derivative carrying truncated <i>hpaS</i> gene lacking the nt 1–162, Tet <sup>r</sup>                                                                     | Author's lab collection |
| pBM <sub>23-202</sub>    | pBT derivative carrying a 540-bp fragment encoding the 23 <sup>th</sup> –202 <sup>th</sup> amino acids of HpaM, Cat <sup>r</sup>                               | This work               |
| pBM <sub>23-225</sub>    | pBT derivative carrying a 609-bp fragment encoding the 23 <sup>th</sup> –225 <sup>th</sup> amino acids of HpaM, Cat <sup>r</sup>                               | This work               |
| pBM <sub>23-248</sub>    | pBT derivative carrying a 678-bp fragment encoding the 23 <sup>th</sup> –248 <sup>th</sup> amino acids of HpaM, Cat <sup>r</sup>                               | This work               |
| pBM <sub>226-349</sub>   | pBT derivative carrying a 372-bp fragment encoding the 226 <sup>th</sup> –349 <sup>th</sup> amino acids of HpaM, Cat <sup>r</sup>                              | This work               |
| pBM <sub>203-349</sub>   | pBT derivative carrying a 441-bp fragment encoding the 203 <sup>th</sup> –349 <sup>th</sup> amino acids of HpaM, Cat <sup>r</sup>                              | This work               |
| pBM <sub>180-349</sub>   | pBT derivatives carrying the 510-bp fragment encoding 180 <sup>th</sup> –349 <sup>th</sup> amino acids of HpaM, Cat <sup>r</sup>                               | This work               |
| pBM <sub>180-271</sub>   | pBT derivative carrying a 276-bp fragment encoding the 180 <sup>th</sup> –271 <sup>th</sup> amino acids of HpaM, Cat <sup>r</sup>                              | This work               |



|                        |                                                                                                                                                                                                                                                                  |                            |
|------------------------|------------------------------------------------------------------------------------------------------------------------------------------------------------------------------------------------------------------------------------------------------------------|----------------------------|
| pBM <sub>180-225</sub> | pBT derivative carrying a 138-bp fragment encoding the 180 <sup>th</sup> –225 <sup>th</sup> amino acids of HpaM, Cat <sup>r</sup>                                                                                                                                | This work                  |
| pBM <sub>180-300</sub> | pBT derivative carrying a 363-bp fragment encoding the 180 <sup>th</sup> –300 <sup>th</sup> amino acids of HpaM, Cat <sup>r</sup>                                                                                                                                | This work                  |
| pBM <sub>180-320</sub> | pBT derivative carrying a 423-bp fragment encoding the 180 <sup>th</sup> –320 <sup>th</sup> amino acids of HpaM, Cat <sup>r</sup>                                                                                                                                | This work                  |
| pBM <sub>180-340</sub> | pBT derivative carrying a 483-bp fragment encoding the 180 <sup>th</sup> –340 <sup>th</sup> amino acids of HpaM, Cat <sup>r</sup>                                                                                                                                | This work                  |
| pL6 <i>gus</i>         | pLAFR6 containing a 1,832-bp <i>gusA</i> ORF (excluding the translational start codon ATG), Tet <sup>r</sup>                                                                                                                                                     | Jiang <i>et al.</i> , 2008 |
| pGUSHpaM               | pLAFR6 containing 404-bp promoter region of the gene <i>hpaM</i> fused to the coding region for <i>gusA</i> , Tet <sup>r</sup>                                                                                                                                   | This work                  |
| pGUShrpG               | pLAFR6 containing an <i>hrpG</i> promoter- <i>gusA</i> fusion fragment, Tet <sup>r</sup>                                                                                                                                                                         | Author's lab collection    |
| pGUShrpX               | pLAFR6 containing an <i>hrpX</i> promoter- <i>gusA</i> fusion fragment, Tet <sup>r</sup>                                                                                                                                                                         | Author's lab collection    |
| pGUShrpA               | pLAFR6 containing an <i>hrpA</i> operon promoter- <i>gusA</i> fusion fragment, Tet <sup>r</sup>                                                                                                                                                                  | Author's lab collection    |
| pGUShrpB               | pLAFR6 containing an <i>hrpB</i> operon promoter- <i>gusA</i> fusion fragment, Tet <sup>r</sup>                                                                                                                                                                  | Author's lab collection    |
| pGUShrpC               | pLAFR6 containing an <i>hrpC</i> operon promoter- <i>gusA</i> fusion fragment, Tet <sup>r</sup>                                                                                                                                                                  | Author's lab collection    |
| pGUShrpD               | pLAFR6 containing an <i>hrpD</i> operon promoter- <i>gusA</i> fusion fragment, Tet <sup>r</sup>                                                                                                                                                                  | Author's lab collection    |
| pGUShrpE               | pLAFR6 containing an <i>hrpE</i> operon promoter- <i>gusA</i> fusion fragment, Tet <sup>r</sup>                                                                                                                                                                  | Author's lab collection    |
| pGUShrpF               | pLAFR6 containing an <i>hrpF</i> operon promoter- <i>gusA</i> fusion fragment, Tet <sup>r</sup>                                                                                                                                                                  | Author's lab collection    |
| pGUS <i>xopN</i>       | pLAFR6 containing the type III secretion signal of <i>xopN</i> (from the 488 <sup>th</sup> bp upstream to the 159 <sup>th</sup> bp downstream of the start codon of <i>XC_0241</i> ) encoding sequence fused with promoterless <i>gus</i> gene, Tet <sup>r</sup> | Author's lab collection    |
| pGUS <i>savrAC</i>     | pLAFR6 containing the type III secretion signal of AvrAC (from the 400 <sup>th</sup> bp upstream to the 600 <sup>th</sup> bp downstream of the start codon of <i>XC_1553</i> ) encoding sequence fused with promoterless <i>gus</i> gene, Tet <sup>r</sup>       | Author's lab collection    |

|                               |                                                                                                                                                                                                                                                       |                         |
|-------------------------------|-------------------------------------------------------------------------------------------------------------------------------------------------------------------------------------------------------------------------------------------------------|-------------------------|
| pLavrAC <sub>102</sub> ::CyaA | pLAFR6 containing the type III secretion signal coding sequence of AvrAC (from the 588 <sup>th</sup> bp upstream to the 306 <sup>th</sup> bp downstream of the start codon) fused with <i>cyaA</i> gene (excluding start codon ATG), Tet <sup>r</sup> | Granted by Prof. Jiang  |
| pRhpaMH6                      | pLAFR3 containing the encoding sequence of HpaM with 6×His tag in its C-terminus, Tet <sup>r</sup>                                                                                                                                                    | This work               |
| pRhpaM <sub>Xoo</sub> H6      | pLAFR3 containing the encoding sequence of HpaM <sub>Xoo</sub> with 6×His tag in its C-terminus, Tet <sup>r</sup>                                                                                                                                     | This work               |
| pRhpaM <sub>Xoc</sub> H6      | pLAFR3 containing the encoding sequence of HpaM <sub>Xoc</sub> with 6×His tag in its C-terminus, Tet <sup>r</sup>                                                                                                                                     | This work               |
| pRavrACH6                     | pLAFR6 containing the encoding sequence of AvrAC with 6xHis tag in its C-terminus , Tet <sup>r</sup>                                                                                                                                                  | This work               |
| pRhpaRIH6                     | pLAFR3 containing the encoding sequence of HpaR1 with 6×His tag in its C-terminus, Tet <sup>r</sup>                                                                                                                                                   | Author's lab collection |
| pRhpaSH6                      | pLAFR3 containing the encoding sequence of HpaS with 6×His tag in its C-terminus, Tet <sup>r</sup>                                                                                                                                                    | Author's lab collection |
| pRhrcCH6                      | pLAFR3 containing the encoding sequence of HrcC with 6×His tag in its C-terminus, Tet <sup>r</sup>                                                                                                                                                    | This work               |
| pRhrcJH6                      | pLAFR3 containing the encoding sequence of HrcJ with 6×His tag in its C-terminus, Tet <sup>r</sup>                                                                                                                                                    | This work               |

## References

- Daniels, M.J., Barber, C.E., Turner, P.C., Sawczyc, M.K., Byrde, R.J.W., and Fielding, A.H. (1984) Cloning of genes involved in pathogenicity of *Xanthomonas campestris* pv. *campestris* using the broad host range cosmid pLAFR1. *EMBO J* **3**: 3323–3328.
- Hopkins, C.M., White, F.F., Choi, S.H., Guo, A., and Leach, J.E. (1992) Identification of a family of avirulence genes from *Xanthomonas oryzae* pv. *oryzae*. *Mol Plant Microbe Interact* **5**: 451–459.
- Huynh, T.V., Dahlbeck, D., and Staskawicz, B.J. (1989) Bacterial blight of soybean: regulation of a pathogen gene determining host cultivar specificity. *Science* **245**: 1374–1377.
- Jiang, B.L., He, Y.Q., Cen, W.J., Wei, H.Y., Jiang, G.F., Jiang, W., *et al.* (2008) The type III secretion effector XopXccN of *Xanthomonas campestris* pv. *campestris* is required for full virulence. *Res Microbiol* **159**: 216–220.

- Leong, S.A., Ditta, G.S., and Helinski, D.R. (1982) Heme biosynthesis in *Rhizobium*. Identification of a cloned gene coding for delta-aminolevulinic acid synthetase from *Rhizobium meliloti*. *J Biol Chem* **257**: 8724–8730.
- Li, R.F., Lu, G.T., Li, L., Su, H.Z., Feng, G.F., Chen, Y., *et al.* (2014) Identification of a putative cognate sensor kinase for the two-component response regulator HrpG, a key regulator controlling the expression of the *hrp* genes in *Xanthomonas campestris* pv. *campestris*. *Environ Microbiol* **16**: 2053–2071.
- Schäfer, A., Tauch, A., Jäger, W., Kalinowski, J., Thierbach, G., and Pühler, A. (1994) Small mobilizable multi-purpose cloning vectors derived from the *Escherichia coli* plasmids pK18 and pK19: selection of defined deletions in the chromosome of *Corynebacterium glutamicum*. *Gene* **145**: 69–73.
- Staskawicz, B., Dahlbeck, D., Keen, N., and Napoli, C. (1987) Molecular characterization of cloned avirulence genes from race 0 and race 1 of *Pseudomonas syringae* pv. *glycinea*. *J Bacteriol* **169**: 5789–5794.
- Xu, R.Q., Blanvillain, S., Feng, J.X., Jiang, B.L., Li, X.Z., Wei, H.Y., *et al.* (2008) AvrAC<sub>(Xcc8004)</sub>, a type III effector with a leucine-rich repeat domain from *Xanthomonas campestris* pathovar *campestris* confers avirulence in vascular tissues of *Arabidopsis thaliana* ecotype Col-0. *J Bacteriol* **190**: 343–55.
- Yanisch-Perron, C., Vieira, J., and Messing, J. (1985) Improved M13 phage cloning vectors and host strains: nucleotide sequences of the M13mp18 and pUC19 vectors. *Gene* **33**: 103–119.



|                                        |                                                                   |                                                                                                                                                                                                  |
|----------------------------------------|-------------------------------------------------------------------|--------------------------------------------------------------------------------------------------------------------------------------------------------------------------------------------------|
|                                        |                                                                   | encoding the 23 <sup>th</sup> -225 <sup>th</sup> amino acids. Used for bacterial two-hybrid assay.                                                                                               |
| <i>hpaM</i> -4F<br><i>hpaM</i> -4R     | GATGGGATCCGCACCGCCAGCGCCTGCC<br>GGGGCTCGAGATCCGACAGATAGATGCC      | 678-bp DNA fragment spans nucleotides 67 to 744 bp of the <i>hpaM</i> ORF sequence, encoding the 23 <sup>th</sup> -248 <sup>th</sup> amino acids. Used for bacterial two-hybrid assay.           |
| <i>hpaM</i> -5F<br><i>hpaM</i> -5R     | GAGGGATCCCTGGAAGACAGCGAGATTCG<br>GGGCTCGAGTTACTCGTGGCGCACGCA      | 372-bp DNA fragment spans nucleotides 676 to 1047 bp of the <i>hpaM</i> ORF sequence, encoding the 226 <sup>th</sup> -349 <sup>th</sup> amino acids. Used for bacterial two-hybrid assay.        |
| <i>hpaM</i> -6F<br><i>hpaM</i> -6R     | GGGGGATCCACCGCCAAGGTGACGATGATG<br>GGGCTCGAGTTACTCGTGGCGCACGCA     | 441-bp DNA fragment spans nucleotides 607 to 1047 bp of the <i>hpaM</i> ORF sequence, encoding the 203 <sup>th</sup> -349 <sup>th</sup> amino acids. Used for bacterial two-hybrid assay.        |
| <i>hpaM</i> -7F<br><i>hpaM</i> -7R     | GGGGGATCCACGCGCGAGATCACCATC<br>GGGCTCGAGTTACTCGTGGCGCACGCA        | 510-bp DNA fragment spans nucleotides 538 to 1047 bp of the <i>hpaM</i> ORF sequence, encoding the 180 <sup>th</sup> -349 <sup>th</sup> amino acids. Used for bacterial two-hybrid assay.        |
| <i>hpaM</i> -8F<br><i>hpaM</i> -8R     | GGGGGATCCACGCGCGAGATCACCATC<br>GGGCTCGAGGCATGCCAGGAAGATGCC        | 276-bp DNA fragment spans nucleotides 538 to 813 bp of the <i>hpaM</i> ORF sequence, encoding the 180 <sup>th</sup> -271 <sup>th</sup> amino acids. Used for bacterial two-hybrid assay.         |
| <i>hpaM</i> -9F<br><i>hpaM</i> -9R     | GGGGGATCCACGCGCGAGATCACCATC<br>GGGCTCGAGATGCTCGGTGGTGAGGCC        | 138-bp DNA fragment spans nucleotides 538 to 675 bp of the <i>hpaM</i> ORF sequence, encoding the 180 <sup>th</sup> -225 <sup>th</sup> amino acids. Used for bacterial two-hybrid assay.         |
| <i>hpaMO</i> -9F<br><i>hpaMO</i> -9R   | ACAGTTGGATCCACGCGCGAGATCACCATCG<br>ACAGTTAAGCTTATGCTCGGTGGTGAGGCC | 138-bp DNA fragment spans nucleotides 538 to 675 bp of the <i>hpaM</i> ORF sequence, encoding 180 <sup>th</sup> -225 <sup>th</sup> amino acids. Used for overexpression and pull-down assay.     |
| <i>hpaM</i> -10F<br><i>hpaM</i> -10R   | GGGGGATCCACGCGCGAGATCACCATC<br>GGGCTCGAGGCTGGCGAAACGGTTGTT 300    | 363-bp DNA fragment spans nucleotides 538 to 900 bp of the <i>hpaM</i> ORF sequence, encoding the 180 <sup>th</sup> -300 <sup>th</sup> amino acids. Used for bacterial two-hybrid assay.         |
| <i>hpaM</i> -11F<br><i>hpaM</i> -11R   | GGGGGATCCACGCGCGAGATCACCATC<br>GGGCTCGAGGAAGTCGGCCGCGCTGCA 320    | 423-bp DNA fragment spans nucleotides 538 to 960 bp of the <i>hpaM</i> ORF sequence, encoding the 180 <sup>th</sup> -320 <sup>th</sup> amino acids. Used for bacterial two-hybrid assay.         |
| <i>hpaMO</i> -11F<br><i>hpaMO</i> -11R | ACAGTTGGATCCACGCGCGAGATCACCATCG<br>ACAGTTAAGCTTGAAGTCGGCCGCGCTGCA | 423-bp DNA fragment spans nucleotides 538 to 960 bp of the <i>hpaM</i> ORF sequence, encoding the 180 <sup>th</sup> -320 <sup>th</sup> amino acids. Used for overexpression and pull-down assay. |
| <i>hpaM</i> -12F                       | GGGGGATCCACGCGCGAGATCACCATC                                       | 483-bp DNA fragment spans nucleotides                                                                                                                                                            |

|                                                                                  |                                                                                                |                                                                                                                                                                                                   |
|----------------------------------------------------------------------------------|------------------------------------------------------------------------------------------------|---------------------------------------------------------------------------------------------------------------------------------------------------------------------------------------------------|
| <i>hpaM</i> -12R                                                                 | GGGCTCGAGCTGCGGCTCGATATCCAC 340                                                                | 538 to 1020 bp of the <i>hpaM</i> ORF sequence, encoding the 180 <sup>th</sup> -340 <sup>th</sup> amino acids. Used for bacterial two-hybrid assay.                                               |
| <i>hpaM</i> -OF<br><i>hpaM</i> -OR                                               | GGGGATCCGCACCGCCAGCGCCTGCC<br>GGGAAGCTTTTACTCGTGGCGCACGCA                                      | 981-bp DNA fragment spans nucleotides 67 to 1047 bp of the <i>hpaM</i> gene sequence, encoding the 23 <sup>th</sup> -349 <sup>th</sup> amino acids. Used for overexpression and pull-down assay.  |
| <i>hrcC</i> -F<br><i>hrcC</i> -R                                                 | GATTGGATCCGCCGCGTCGGTGCCGTGG<br>GGGCTCGAGTCAGGGCGAGACGATATG                                    | 1716-bp DNA fragment spans nucleotides 100 to 1815 bp of <i>hrcC</i> ORF, encoding the 34 <sup>th</sup> -605 <sup>th</sup> amino acids. Used for bacterial two-hybrid assay.                      |
| <i>hrcC</i> -N1F<br><i>hrcC</i> -N1R                                             | GATTGGATCCGCCGCGTCGGTGCCGTGG<br>GGGCTCGAGATCGATCTGCAGCAGCTT                                    | 1011-bp DNA fragment spans nucleotides 100 to 1110 bp of the <i>hrcC</i> ORF sequence, encoding the 34 <sup>th</sup> -370 <sup>th</sup> amino acids. Used for bacterial two-hybrid assay.         |
| <i>hrcC</i> -N2F<br><i>hrcC</i> -N2R                                             | GGGGATCCGCCGCGTCGGTGCCGTGG<br>GGGAAGCTTATCGATCTGCAGCAGCTT                                      | 1011-bp DNA fragment spans nucleotides 100 to 1110 bp of the <i>hrcC</i> ORF sequence, encoding the 34 <sup>th</sup> -370 <sup>th</sup> amino acids. Used for overexpression and pull-down assay. |
| <i>hrcJ</i> -F<br><i>hrcJ</i> -R                                                 | GGGGGATCCCAGCTGTATTCCGGGCTGAC<br>GGGCTCGAGTCACCCCGCATGTTTTCT                                   | 699-bp DNA fragment spans nucleotides 64 to 762 bp of <i>hrcJ</i> gene sequence, encoding the 22 <sup>th</sup> -254 <sup>th</sup> amino acids. Used for bacterial two-hybrid assay.               |
| <i>hrcJ</i> -N1F<br><i>hrcJ</i> -N1R                                             | GGGGGATCCCAGCTGTATTCCGGGCTGAC<br>GATTCTCGAG GGCACGCGGCGGCGCCGA                                 | 555-bp DNA fragment spans nucleotides 64 to 618 bp of the <i>hrcJ</i> ORF sequence, encoding the 22 <sup>th</sup> -206 <sup>th</sup> amino acids. Used for bacterial two-hybrid assay.            |
| <i>hrcJ</i> -N2F<br><i>hrcJ</i> -N2R                                             | ACAGTTGGATCCCAGCTGTATTCCGGGCTGAC<br>ACAGTTAAGCTT GGCACGCGGCGGCGCCGA                            | 555-bp DNA fragment spans nucleotides 64 to 618 bp of the <i>hrcJ</i> ORF sequence, encoding the 22 <sup>th</sup> -206 <sup>th</sup> amino acids. Used for overexpression and pull-down assay.    |
| <i>hpaM</i> -RTP1<br><i>hpaM</i> -RTP2<br><i>hpaM</i> -RTP3<br><i>hpaM</i> -RTP4 | AGATAGATGCCCTGGCTGCC<br>CGGTGCGATTGAACGACACG<br>CGGTGCTGGCCACGATCTGCAT<br>ATCGGCCATGCGCAGCACGG | located within the ORF <i>hapM</i> , used for 5'-RACE                                                                                                                                             |
| RP- <i>hpaM</i> F<br>RP- <i>hpaM</i> R                                           | ACAGTTGAATCACGCACCGGCCACTTCCCC<br>ACAGTTGGATCCCATGCGGATTCCGGTCAGT                              | 404-bp DNA sequence upstream of the translational start codon of <i>hpaM</i> (including ATG). Used for construction of reporter plasmid.                                                          |
| <i>LavrAC</i> -F<br><i>LavrAC</i> -R                                             | AAAGGATCC GTTTTTCGATTTCTGTTGA<br>AAATCTAGA GGTGCTCATATCCCACAAATTAAGA                           | 577-bp DNA sequence upstream of <i>avrAC</i> , used for construction of <i>avrAC</i> deletion mutant.                                                                                             |
| <i>RavrAC</i> -F                                                                 | AAATCTAGATTGCGCGCTGCCCGCCCGTTGGTGAA                                                            | 461-bp DNA sequence downstream of                                                                                                                                                                 |

|                      |                                                                                                     |                                                                                                                                                    |
|----------------------|-----------------------------------------------------------------------------------------------------|----------------------------------------------------------------------------------------------------------------------------------------------------|
| RavrAC-R             | CCGA <u>AAGCTT</u> ATCTCCTGAATCACCACC                                                               | <i>avrAC</i> , used for construction of <i>avrAC</i> deletion mutant.                                                                              |
| HavrAC-F<br>HavrAC-R | AAAGGATCCCCTGGGCAAGGCCAATTATAGCGGCGT<br>AA <u>ACTGCAGCT</u> AGTGGTGGTGGTGGTGGTGGTGAACC<br>TGGTT     | DNA fragment of 2196-bp <i>avrAC</i> promoter sequence and coding sequence fusing with 6×His tag encoded sequence. Used for western blot analysis. |
| GusF<br>GusR         | ACAGTTGGATCCTTACGTCCTGTAGAAACCCC<br>ACAGTT <u>CTGCAGGGCTT</u> CCCCCCCCCCCCCTGCAG                    | 1,832-bp DNA fragment spans nucleotides 4 to 1,835 of the <i>gusA</i> ORF.                                                                         |
| L3053F<br>L3053R     | ACAGTTGGATCCGCAGCGAGGGCCTGGAAG<br>ACAGTT <u>TCTAGAGCGGAAACGGAGCGGGCA</u>                            | 879-bp DNA sequence upstream of <i>hpaM<sub>Xoc</sub></i> , used for construction of <i>hpaM<sub>Xoc</sub></i> deletion mutant.                    |
| R3053F<br>R3053R     | ACAGTT <u>TCTAGATATCGACCCGCAGCGCTA</u><br>ACAGTTA <u>AAGCTT</u> ATCTGTGGCGTCAGAAG                   | 591-bp DNA sequence downstream of <i>hpaM<sub>Xoc</sub></i> , used for construction of <i>hpaM<sub>Xoc</sub></i> deletion mutant.                  |
| C3053F<br>C3053R     | ACAGTTGGATCCATGCCTTTGCTTGCCCGCTC<br>ACAGA <u>AAGCTTTT</u> ATTGCTCGTGCGCAC                           | 1053-bp DNA fragment of the <i>hpaM<sub>Xoc</sub></i> ORF sequence                                                                                 |
| L01147F<br>L01147R   | ACAGTTGGATCCGCAGCGAGGGCATGGAAG<br>ACAGTT <u>TCTAGAGCGGAAACGGAGCGGGCA</u>                            | 879-bp DNA sequence upstream of <i>hpaM<sub>Xoo</sub></i> , used for construction of <i>hpaM<sub>Xoo</sub></i> deletion mutant.                    |
| R01147F<br>R01147R   | ACAGTT <u>TCTAGATATCGACCCGCAACGCTA</u><br>ACAGTTA <u>AAGCTT</u> ATCTGTGGCGTCAGAAG                   | 591-bp DNA sequence downstream of <i>hpaM<sub>Xoo</sub></i> , used for construction of <i>hpaM<sub>Xoo</sub></i> deletion mutant.                  |
| C01147F<br>C01147R   | ACAGTTGGATCCATGCCTTTGCTTGCCCGCTC<br>ACAGA <u>AAGCTTTT</u> ATTGCTCCTGGCGCAC                          | 1053-bp DNA fragment of the <i>hpaM<sub>Xoo</sub></i> ORF sequence                                                                                 |
| 01147F<br>01147R     | ACAGTTGGATCCATGCCTTTGCTTGCCCGCTC<br>ACAGTTA <u>AAGCTTTT</u> AGTGGTGGTGGTGGTGGTGGTGGTCTCT<br>GGCGCAC | DNA fragment of 1050-bp <i>hpaM<sub>Xoo</sub></i> gene coding sequence of <i>Xoo</i> strain fusing with 6×His tag encoding sequence.               |
| 3053F<br>3053R       | ACAGTTGGATCCATGCCTTTGCTTGCCCGCTC<br>ACAGTTA <u>AAGCTTTT</u> AGTGGTGGTGGTGGTGGTGGTGGTCTCT<br>GGCGCAC | DNA fragment of 1050-bp <i>hpaM<sub>Xoc</sub></i> gene coding sequence of <i>Xoc</i> strain fusing with 6×His tag encoding sequence.               |

<sup>§</sup>The underlined sequences indicate the restriction sites for *Bam*HI, *Eco*RI, *Hind*III,

*Pst*I, *Xba*I and *Xho*I, respectively.

**Table S3.** HpaM homologues in *Xanthomonas* spp. and other plant bacterial pathogens

| species                                                                                           | gene               | Length (aa) | Function predicted                        | Identity /similarity | Signal peptide                       | Transmembrane domain                  | reference              |
|---------------------------------------------------------------------------------------------------|--------------------|-------------|-------------------------------------------|----------------------|--------------------------------------|---------------------------------------|------------------------|
| <i>Xanthomonas campestris</i> pv. <i>raphani</i>                                                  | XCR_1659           | 349         | putative lipoprotein                      | 98.9/99.7            | 1 <sup>th</sup> -22 <sup>th</sup> aa | 8 <sup>th</sup> -29 <sup>th</sup> aa  | Bogdanove et al., 2011 |
| <i>Xanthomonas oryzae</i> pv. <i>oryzicola</i>                                                    | XOC_3053           | 350         | lipoprotein, putative                     | 92/96.9              | 1 <sup>th</sup> -22 <sup>th</sup> aa | 3 <sup>th</sup> -23 <sup>th</sup> aa  | Bogdanove et al., 2011 |
| <i>Xanthomonas axonopodis</i>                                                                     | XAC29_07240        | 350         | hypothetical protein                      | 91.4/96.6            | 1 <sup>th</sup> -22 <sup>th</sup> aa | 3 <sup>th</sup> -23 <sup>th</sup> aa  | accession CP004399.1   |
| <i>Xanthomonas oryzae</i> pv. <i>oryzae</i>                                                       | PXO_01147          | 350         | hypothetical protein                      | 90.9/96.3            | 1 <sup>th</sup> -22 <sup>th</sup> aa | 3 <sup>th</sup> -23 <sup>th</sup> aa  | Salzberg et al., 2008  |
| <i>Xanthomonas citri</i> pv. <i>citri</i>                                                         | XAC1434            | 348         | conserved hypothetical protein            | 90.6/96.0            | 1 <sup>th</sup> -20 <sup>th</sup> aa | 2 <sup>th</sup> -21 <sup>th</sup> aa  | da Silva et al., 2002  |
| <i>Xanthomonas alfalfae</i>                                                                       | XACM_1423          | 368         | hypothetical protein                      | 87/92.1              | 1 <sup>th</sup> -40 <sup>th</sup> aa | 21 <sup>th</sup> -41 <sup>th</sup> aa | Jalan et al., 2011     |
| <i>Xanthomonas perforans</i> (formerly <i>Xanthomonas axonopodis</i> pv. <i>vesicatoria</i> )     | XPE_3657           | 368         | hypothetical protein                      | 87/92.1              | 1 <sup>th</sup> -40 <sup>th</sup> aa | 21 <sup>th</sup> -41 <sup>th</sup> aa | Potnis et al., 2011    |
| <i>Xanthomonas euvesicatoria</i> (formerly <i>Xanthomonas campestris</i> pv. <i>vesicatoria</i> ) | XCV1491            | 368         | putative secreted protein                 | 87.2/91.8            | 1 <sup>th</sup> -40 <sup>th</sup> aa | 25 <sup>th</sup> -44 <sup>th</sup> aa | Thieme et al., 2005    |
| <i>Xanthomonas fuscans</i> subsp. <i>fuscans</i>                                                  | XFF4834R_ch r30620 | 368         | putative pectin lyase                     | 87.2/91.8            | 1 <sup>th</sup> -28 <sup>th</sup> aa | 21 <sup>th</sup> -44 <sup>th</sup> aa | Darrasse et al., 2013  |
| <i>Xanthomonas translucens</i> pv. <i>undulosa</i>                                                | FD63_12180         | 363         | hypothetical protein                      | 62/74.1              | 1 <sup>th</sup> -41 <sup>th</sup> aa | 22 <sup>th</sup> -42 <sup>th</sup> aa | Peng et al., 2016      |
| <i>Xanthomonas sacchari</i>                                                                       | SB85_05035         | 348         | hypothetical protein                      | 61.1/73.7            | 1 <sup>th</sup> -16 <sup>th</sup> aa | 6 <sup>th</sup> -23 <sup>th</sup> aa  | accession CP010409.1   |
| <i>Xanthomonas albilineans</i>                                                                    | XALc_2014          | 347         | polygalacturonase domain protein          | 59.9/71.6            | 1 <sup>th</sup> -23 <sup>th</sup> aa | 6 <sup>th</sup> -25 <sup>th</sup> aa  | Pieretti et al., 2009  |
| <i>Pseudoxanthomonas spadix</i>                                                                   | DSC_11120          | 342         | Putative secreted protein                 | 56.4/67.1            | 1 <sup>th</sup> -17 <sup>th</sup> aa | 53 <sup>th</sup> -69 <sup>th</sup> aa | Lee et al., 2012       |
| <i>Xylella fastidiosa</i> subsp. <i>fastidiosa</i>                                                | XFLM_05720         | 342         | carbohydrate-binding and sugar hydrolysis | 55.1/68.6            | 1 <sup>th</sup> -24 <sup>th</sup> aa | 5 <sup>th</sup> -26 <sup>th</sup> aa  | Schreiber et al., 2010 |
| <i>Xylella fastidiosa</i>                                                                         | XF_0119            | 342         | hypothetical                              | 54.6/67.7            | 1 <sup>th</sup> -24 <sup>th</sup> aa | 7 <sup>th</sup> -28 <sup>th</sup> aa  | Simpson et             |



|                                                                                |            |     | protein                  |           |                                      |                                    | al., 2000                                      |
|--------------------------------------------------------------------------------|------------|-----|--------------------------|-----------|--------------------------------------|------------------------------------|------------------------------------------------|
| <i>Pseudoxanthomonas suwonensis</i>                                            | Psesu_2275 | 369 | OmpA/MotB domain protein | 13.4/24.1 | 1 <sup>th</sup> -22 <sup>th</sup> aa | 5 <sup>th</sup> - 23 <sup>th</sup> | accession CP002446.1                           |
| <i>Pseudoxanthomonas</i> sp. Root630                                           | No         |     |                          |           |                                      |                                    | Bai et al., 2015                               |
| <i>Pseudoxanthomonas</i> sp. Root65                                            | No         |     |                          |           |                                      |                                    | Bai et al., 2015                               |
| <i>Pseudoxanthomonas dokdonensis</i>                                           | No         |     |                          |           |                                      |                                    | Patil et al., 2016                             |
| <i>Pseudoxanthomonas mexicana</i>                                              | No         |     |                          |           |                                      |                                    | GCA_001556105.1                                |
| <i>Pantoea ananatis</i> (formerly <i>Xanthomonas uredovorus</i> )              | No         |     |                          |           |                                      |                                    | Hara et al., 2012                              |
| <i>Stenotrophomonas maltophilia</i> (formerly <i>Xanthomonas maltiphilia</i> ) | No         |     |                          |           |                                      |                                    | Crossman et al., 2008                          |
| <i>Ralstonia solanacearum</i>                                                  | No         |     |                          |           |                                      |                                    | Salanoubat et al., 2002                        |
| <i>Pseudomonas</i> group                                                       | No         |     |                          |           |                                      |                                    | Stover et al., 2000<br>Buell et al., 2003      |
| <i>Erwinia</i> group                                                           | No         |     |                          |           |                                      |                                    | Bell et al., 2004<br>Smits et al., 2010        |
| <i>Dickeya</i> (formerly <i>Erwinia chrysanthemi</i> )                         | No         |     |                          |           |                                      |                                    | Pritchard et al., 2013                         |
| <i>Pantoea</i> group                                                           | No         |     |                          |           |                                      |                                    | Medrano & Bell, 2012<br>Matsuzawa et al., 2012 |
| <i>Pectobacterium carotovorum</i>                                              | No         |     |                          |           |                                      |                                    | Park et al., 2012                              |

Searching the HpaM homologues in plant bacterial pathogens were carried out by blast the genome sequences in KEGG database and NCBI database with the HpaM sequence. All the *Xanthomonas* spp. strains whose genome sequences were available in both databases were scanned and the representative strains were shown here.

Identity/similarity analysis was performed using the Align X program in Vector NTI software. Signal peptide and transmembrane domain predictions were carried with the SMART (Simple Modular Architecture Research Tool) program (<http://smart.embl-heidelberg.de>) and the TMPRED program ([http://www.ch.embnet.org/software/TMPRED\\_form.html](http://www.ch.embnet.org/software/TMPRED_form.html)), respectively. **No**, no significant similarity protein (similarity>20%) was found within the genome sequence.

## Reference

- Bai Y, Müller DB, Srinivas G, Garrido-Oter R, Potthoff E, Rott M, *et al.* (2015) Functional overlap of the *Arabidopsis* leaf and root microbiota. *Nature* **528**: 364-9.
- Bell KS, Sebahia M, Pritchard L, Holden MT, Hyman LJ, Holeva MC, *et al.* (2004) Genome sequence of the enterobacterial phytopathogen *Erwinia carotovora* subsp. *atroseptica* and characterization of virulence factors. *Proc Natl Acad Sci USA*. **101**: 11105-10.
- Bogdanove AJ, Koebnik R, Lu H, Furutani A, Angiuoli SV, Patil PB, *et al.* (2011) Two new complete genome sequences offer insight into host and tissue specificity of plant pathogenic *Xanthomonas* spp. *J Bacteriol.* **193**: 5450-5464.
- Buell CR, Joardar V, Lindeberg M, Selengut J, Paulsen IT, Gwinn ML, *et al.* (2003) The complete genome sequence of the *Arabidopsis* and tomato pathogen *Pseudomonas syringae* pv. *tomato* DC3000. *Proc Natl Acad Sci USA*. **100**: 10181-6.
- Crossman LC, Gould VC, Dow JM, Vernikos GS, Okazaki A, Sebahia M, *et al.* (2008) The complete genome, comparative and functional analysis of *Stenotrophomonas maltophilia* reveals an organism heavily shielded by drug resistance determinants.

- Genome Biol.* **9**: R74.
- da Silva AC, Ferro JA, Reinach FC, Farah CS, Furlan LR, Quaggio RB, *et al.* (2002) Comparison of the genomes of two *Xanthomonas* pathogens with differing host specificities. *Nature* **417**: 459-63.
- Darrasse A, Carrère S, Barbe V, Boureau T, Arrieta-Ortiz ML, Bonneau S, *et al.* (2013) Genome sequence of *Xanthomonas fuscans* subsp. *fuscans* strain 4834-R reveals that flagellar motility is not a general feature of xanthomonads. *BMC Genomics*. **14**: 761.
- Hara Y, Kadotani N, Izui H, Katashkina JI, Kuvaeva TM, Andreeva IG, *et al.* (2012) The complete genome sequence of *Pantoea ananatis* AJ13355, an organism with great biotechnological potential. *Appl Microbiol Biotechnol.* **93**: 331-41.
- Jalan N, Aritua V, Kumar D, Yu F, Jones JB, Graham JH, *et al.* (2011) Comparative genomic analysis of *Xanthomonas axonopodis* pv. *citrumelo* F1, which causes citrus bacterial spot disease, and related strains provides insights into virulence and host specificity. *J Bacteriol.* **193**: 6342-57.
- Lee SH, Jin HM, Lee HJ, Kim JM, and Jeon CO. (2012) Complete genome sequence of the BTEX-degrading bacterium *Pseudoxanthomonas spadix* BD-a59. *J Bacteriol.* **194**: 544.
- Matsuzawa T, Mori K, Kadowaki T, Shimada M, Tashiro K, Kuhara S, *et al.* (2012) Genome sequence of *Pantoea agglomerans* strain IG1. *J Bacteriol.* **194**: 1258-9.
- Medrano EG and Bell AA. (2012) Genome sequence of *Pantoea* sp. strain Sc 1, an opportunistic cotton pathogen. *J Bacteriol.* **194**: 3019.
- Park TH, Choi BS, Choi AY, Choi IY, Heu S, and Park BS. (2012) Genome sequence of *Pectobacterium carotovorum* subsp. *carotovorum* strain PCC21, a pathogen causing soft rot in Chinese cabbage. *J Bacteriol.* **194**: 6345-6.

- Patil PP, Midha S, Kumar S, and Patil PB. (2016) Genome Sequence of Type Strains of Genus *Stenotrophomonas*. *Front Microbiol.* **7**: 309.
- Peng Z, Hu Y, Xie J, Potnis N, Akhunova A, Jones J, *et al.* (2016) Long read and single molecule DNA sequencing simplifies genome assembly and TAL effector gene analysis of *Xanthomonas translucens*. *BMC Genomics.* **17**: 21.
- Pieretti I, Royer M, Barbe V, Carrere S, Koebnik R, Cociancich S, *et al.* (2009) The complete genome sequence of *Xanthomonas albilineans* provides new insights into the reductive genome evolution of the xylem-limited *Xanthomonadaceae*. *BMC Genomics.* **10**: 616.
- Potnis N, Krasileva K, Chow V, Almeida NF, Patil PB, Ryan RP, *et al.* (2011) Comparative genomics reveals diversity among *xanthomonads* infecting tomato and pepper. *BMC Genomics.* **12**: 146.
- Pritchard L, Humphris S, Saddler GS, Elphinstone JG, Pirhonen M, and Toth IK. (2013) Draft genome sequences of 17 isolates of the plant pathogenic bacterium *dickeya*. *Genome Announc.* **1**(6).
- Salanoubat M, Genin S, Artiguenave F, Gouzy J, Mangenot S, Arlat M, *et al.* (2002) Genome sequence of the plant pathogen *Ralstonia solanacearum*. *Nature* **415**: 497-502.
- Salzberg SL, Sommer DD, Schatz MC, Phillippy AM, Rabinowicz PD, Tsuge S, *et al.* (2008) Genome sequence and rapid evolution of the rice pathogen *Xanthomonas oryzae* pv. *oryzae* PXO99<sup>A</sup>. *BMC Genomics.* **9**: 204.
- Schreiber HL, Koirala M, Lara A, Ojeda M, Dowd SE, Bextine B, *et al.* (2010) Unraveling the first *Xylella fastidiosa* subsp. *fastidiosa* genome from Texas. *Southwestern Entomologist.* **35**: 479-483.
- Simpson AJ, Reinach FC, Arruda P, Abreu FA, Acencio M, Alvarenga R, *et al.* (2000)

The genome sequence of the plant pathogen *Xylella fastidiosa*. The *Xylella fastidiosa* Consortium of the Organization for Nucleotide Sequencing and Analysis. *Nature* **406**: 151-9.

Smits TH, Rezzonico F, Kamber T, Blom J, Goesmann A, Frey JE, *et al.* (2010) Complete genome sequence of the fire blight pathogen *Erwinia amylovora* CFBP 1430 and comparison to other *Erwinia* spp. *Mol Plant Microbe Interact.* **23**: 384-93.

Stover CK, Pham XQ, Erwin AL, Mizoguchi SD, Warrenner P, Hickey MJ, *et al.* (2000) Complete genome sequence of *Pseudomonas aeruginosa* PAO1, an opportunistic pathogen. *Nature* **406**: 959-64.

Thieme F, Koebnik R, Bekel T, Berger C, Boch J, Büttner D, *et al.* (2005) Insights into genome plasticity and pathogenicity of the plant pathogenic bacterium *Xanthomonas campestris* pv. *vesicatoria* revealed by the complete genome sequence. *J Bacteriol.* **187**: 7254-66.
